# Supplementary material for: IL-15 trans-presentation by pulmonary dendritic cells promotes effector CD8 T cell survival during influenza virus infection
Source: PubMed Central journal article supplement — J Exp Med. 2010 Mar 15;207(3):521–34. doi: 10.1084/jem.20091711 (PMC2839152; doi:10.1084/jem.20091711), 2010-03-15
Supplement: supp_jem.20091711_JEM_20091711_sm.pdf [file supp_jem.20091711_JEM_20091711_sm.pdf]

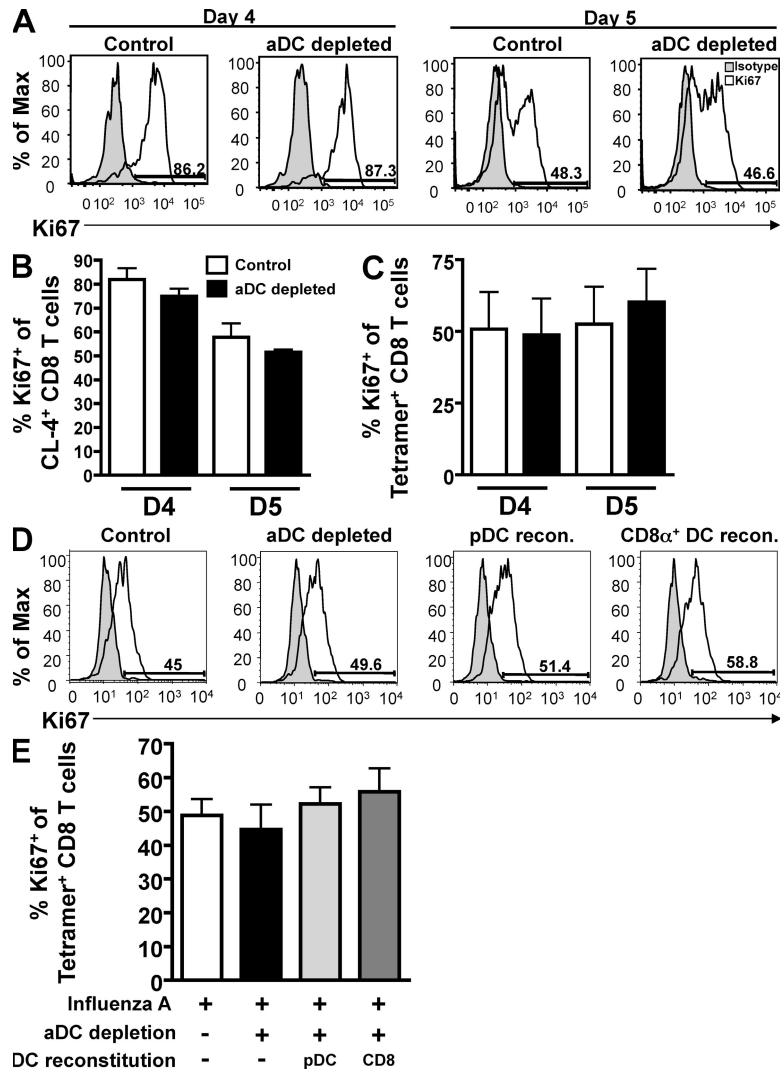

**Figure S1. aDC depletion at 48 h p.i. does not alter IAV-specific CD8 T cell proliferation in the lungs.** (A and B) Influenza-specific, CD90.2<sup>+</sup> CL-4 T cells were adoptively transferred to groups of CD90.1<sup>+</sup> BALB/c mice as in Fig. 1. 24 h later, mice were infected with a sublethal dose of IAV with or without aDC depletion. On days 4 and 5 p.i., mice were sacrificed and proliferation, as measured by Ki67 expression, of adoptively transferred CD90.2<sup>+</sup> CL-4 T cells was assessed by flow cytometry. (A) Shown are representative isotype (shaded) or Ki67 (continuous line) staining for control, undepleted, and aDC-depleted mice on days 4 and 5 p.i. Data in A and B are representative of three experiments and represent means  $\pm$  SEM ( $n = 3-4$  mice/group). (C) Groups of BALB/c mice were IAV infected with or without aDC depletion as in Fig. S1. On days 4 and 5 p.i., mice were sacrificed and proliferation, as measured by Ki67 expression, of tetramer<sup>+</sup> CD8 T cells was assessed by flow cytometry. Data in C are pooled from two separate experiments and represent means  $\pm$  SEM ( $n = 6$  mice/group). (D and E) Mice were infected and aDC depleted as in C; however, groups of aDC-depleted mice were reconstituted with purified pulmonary pDCs (light gray bars) or CD8 $\alpha^+$  DCs (dark gray bars) on day 3 p.i. (i.e., 24 h after depletion). Mice were sacrificed on day 5 p.i. and assessed for IAV-specific CD8 T cell proliferation as in C. (D) Shown are representative isotype (shaded) or Ki67 staining (continuous line) for control undepleted, aDC-depleted, pDC-reconstituted, and CD8 $\alpha^+$  DC-reconstituted groups. Data are gated on CD3<sup>+</sup>CD8<sup>+</sup>tetramer<sup>+</sup> T cells. Data in E are pooled from two separate experiments and represent means  $\pm$  SEM ( $n = 6$  mice/group).

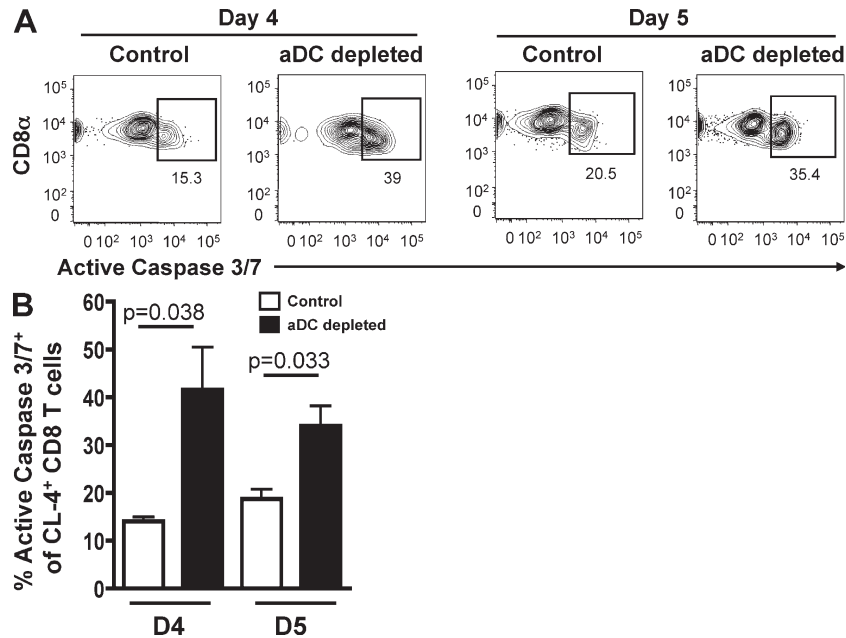

**Figure S2. aDC depletion at 48 h p.i. results in increased apoptosis by virus-specific CD8 T cells.** Influenza-specific, CD90.2+ CL-4 T cells were adoptively transferred to groups of CD90.2+ BALB/c mice as described in Materials and methods. 24 h later, mice were infected with a sublethal dose of IAV with or without aDC depletion as outlined in Fig. S1. On days 4 and 5 p.i., mice were sacrificed and apoptosis, as measured by the presence of active caspase 3/7, of CD90.2+ CL-4 T cells was measured by flow cytometry. (A) Representative FACS plots from day 4 and 5 p.i. are gated on CD3+CD8+ T cells. Data are representative of three separate experiments ( $n = 3-4$  mice/group). Means  $\pm$  SEM are shown.

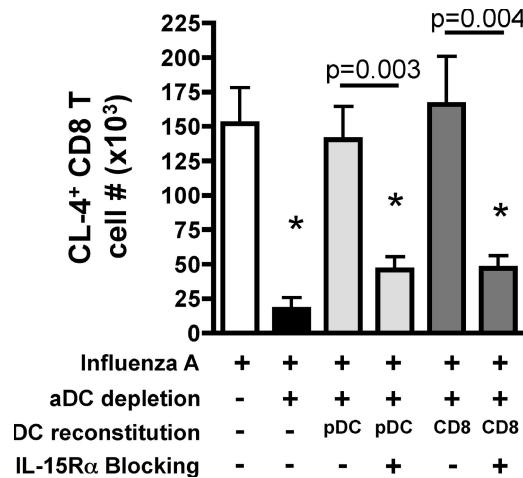

**Figure S3. Pulmonary pDC- and CD8 $\alpha$ + DC-mediated rescue of IAV-specific CD8 T cell responses from aDC-depleted mice requires IL-15 trans-presentation.** Influenza-specific, CD90.1+ CL-4 T cells were adoptively transferred to groups of CD90.2+ BALB/c mice as described in Materials and methods. 24 h later, mice were infected with a sublethal dose of IAV with or without aDC depletion as outlined in Fig. 1. On day 3 p.i., groups of aDC-depleted mice were reconstituted i.n. with  $2.5 \times 10^4$  purified pulmonary pDCs (light gray bars) or CD8 $\alpha$ + DCs (dark gray bars) that were left untreated or blocked in vitro with anti-IL-15R $\alpha$  antibody. On day 6 p.i., the number of pulmonary adoptively transferred, CD90.1+ CL-4 CD8 T cells was enumerated by flow cytometry. Data are pooled from two separate experiments and represent means  $\pm$  SEM ( $n = 7-8$  mice/group). \*,  $P < 0.05$  compared to influenza-only control mice.

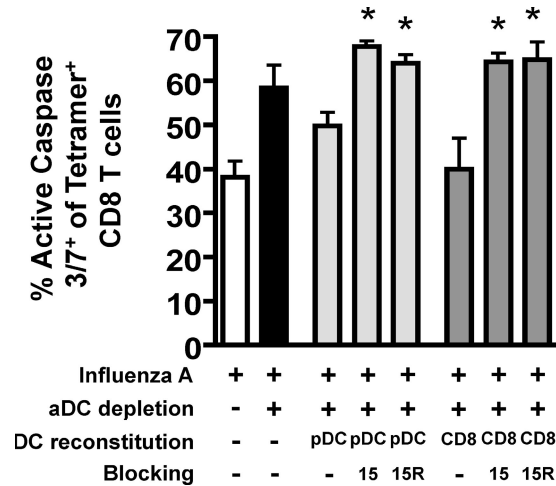

**Figure S4. Blocking IL-15 or IL-15R $\alpha$  on the surface of pulmonary DC subsets before adoptive transfer ablates pulmonary DC-mediated rescue of IAV-specific CD8 T cell apoptosis in the lungs of aDC-depleted mice.** Groups of BALB/c mice were infected with a sublethal dose of IAV with or without aDC depletion as in Fig. 1. On day 3 p.i., groups of aDC-depleted mice were then reconstituted i.n. with  $2.5 \times 10^4$  purified pulmonary pDCs (light gray bars) or CD8 $\alpha^+$  DCs (dark gray bars) that were blocked in vitro with anti-IL-15 (15) or anti-IL-15R $\alpha$  (15R) antibody before adoptive transfer. On day 5 p.i., the lungs were analyzed for the frequency of apoptosis of tetramer $^+$  CD8 T cells. Data are representative of two separate experiments and represent means  $\pm$  SEM ( $n = 3-4$  mice/group). \*,  $P \leq 0.05$  relative to influenza virus infection-only controls.

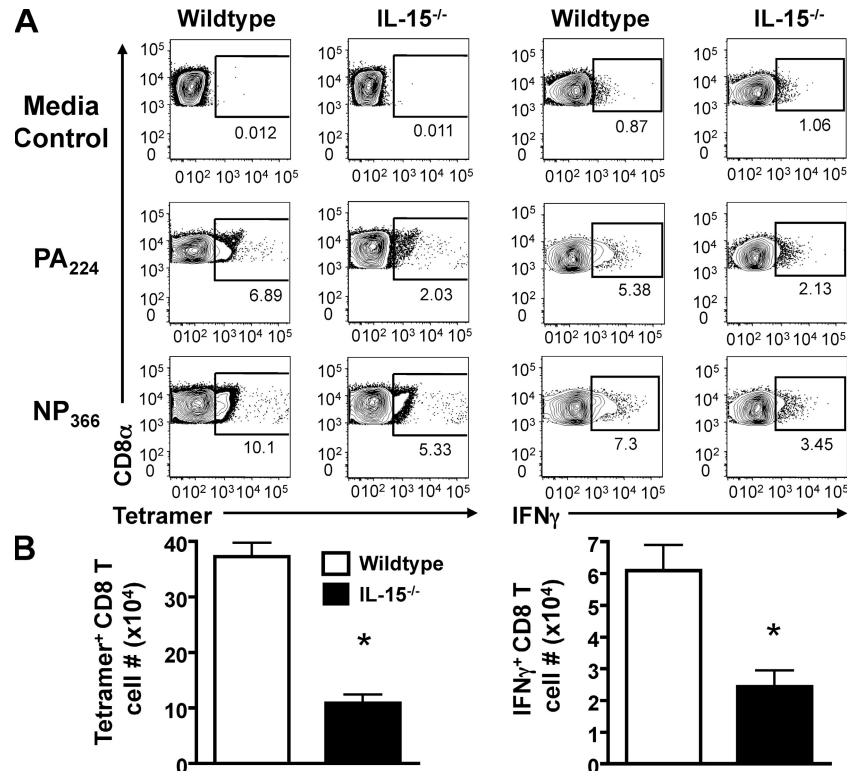

**Figure S5. IL-15 $^{-/-}$  mice exhibit reduced IAV-specific CD8 T cell numbers in the lungs after IAV infection.** Groups of IL-15 $^{-/-}$  and wild-type control IL-15 $^{+/+}$  C57BL/6 mice were infected with a sublethal dose of IAV. On day 8 p.i., the (A) frequency and (B) number of virus-specific CD8 T cells in the lungs were measured by tetramer (left) or ICS for IFN- $\gamma$  (right). Representative FACS plots in A are gated on CD3 $^+$ CD8 $^+$  T cells. Numbers of tetramer $^+$  or IFN- $\gamma^+$  CD8 T cells in the lungs were determined by subtracting background staining using the media control (A, top). Data are representative of two separate experiments and represent means  $\pm$  SEM ( $n = 4-5$  mice/group). \*,  $P \leq 0.05$  relative to influenza virus infection-only controls.
